# Supplementary material for: Liver Stiffness-Based Risk Prediction Model for Hepatocellular Carcinoma in Patients with Nonalcoholic Fatty Liver Disease
Source: MDPI journal article supplement (doi:10.3390/cancers13184567), 2021-09-11
Supplement: s1 [file s1]

# Supplementary Materials: Liver Stiffness-Based Risk Prediction Model for Hepatocellular Carcinoma in Patients with Nonalcoholic Fatty Liver Disease

Jae Seung Lee, Dong Hyun Sinn, Soo Young Park, Hye Jung Shin, Hye Won Lee, Beom Kyung Kim, Jun Yong Park, Do Young Kim, Sang Hoon Ahn, Joo Hyun Oh, Jung Il Lee and Seung Up Kim

**Table S1.** Comparison of baseline characteristics between the training and validation cohorts.

| Variable                              | Training cohort<br>(n=2,666) | Validation cohort<br>(n=467) | P value |
|---------------------------------------|------------------------------|------------------------------|---------|
| Age (years)                           | 52.0 (41.0–60.0)             | 53.0 (38.0–62.0)             | 0.222   |
| Male sex                              | 1,524 (57.2)                 | 244 (52.3)                   | 0.048   |
| Diabetes mellitus                     | 1,029 (38.6)                 | 100 (21.4)                   | <0.001  |
| Hypertension                          | 1,080 (40.5)                 | 100 (21.4)                   | <0.001  |
| Body mass index (kg/m <sup>2</sup> )  | 26.18 (24.17–28.73)          | 27.74 (25.80–29.40)          | <0.001  |
| Liver cirrhosis*                      | 171 (6.4)                    | 44 (9.4)                     | 0.018   |
| Transient elastography                |                              |                              |         |
| LS (kPa)                              | 5.9 (4.6–7.9)                | 6.5 (5.0–9.6)                | 0.006   |
| < 7.5                                 | 1,903 (71.4)                 | 297 (63.6)                   |         |
| 7.5–9.3                               | 333 (12.4)                   | 45 (9.6)                     |         |
| 9.3–11.0                              | 127 (4.8)                    | 44 (9.4)                     | <0.001  |
| 11.0–14.0                             | 112 (4.2)                    | 24 (5.2)                     |         |
| ≥ 14.0                                | 191 (7.2)                    | 57 (12.2)                    |         |
| CAP (dB/m)                            | 303 (273–331)                | 300.0 (275–325)              | 0.207   |
| Laboratory test results               |                              |                              |         |
| Platelet count (×10 <sup>3</sup> /μL) | 236.0 (200.0–279.0)          | 240.5 (198.0–285.5)          | 0.097   |
| AST (IU/L)                            | 33 (24–49)                   | 47 (31–74)                   | <0.001  |
| ALT (IU/L)                            | 41 (24–68)                   | 57 (30–98)                   | <0.001  |
| Total bilirubin (mg/dL)               | 0.7 (0.5–0.9)                | 0.61 (0.44–0.85)             | <0.001  |
| Serum albumin (g/dL)                  | 4.5 (4.3–4.7)                | 4.7 (4.4–4.9)                | <0.001  |
| Prothrombin time (INR)                | 0.95 (0.91–1.00)             | 1.00 (0.97–1.05)             | <0.001  |
| Serum creatinine (mg/dL)              | 0.78 (0.66–0.92)             | 0.77 (0.65–0.91)             | 0.012   |
| Gamma-GT (mg/dL)                      | 45 (28–73)                   | 49 (44–59)                   | <0.001  |
| Alkaline Phosphatase (IU/L)           | 64 (53–79)                   | 75 (62–91)                   | <0.001  |
| Triglyceride (mg/dL)                  | 155 (110–208)                | 154 (107–208)                | 0.471   |
| LDL-cholesterol (mg/dL)               | 121 (94–148)                 | 116 (87–147)                 | 0.002   |
| HDL-cholesterol (mg/dL)               | 45 (39–52)                   | 46 (39–55)                   | 0.039   |
| Total cholesterol (mg/dL)             | 189 (162–216)                | 180 (149–213)                | 0.000   |

Values are expressed as median (interquartile range) or n (%). LS, liver stiffness; CAP, controlled attenuated parameter; AST, aspartate aminotransferase; ALT, alanine aminotransferase; INR, international normalized ratio; gamma-GT, gamma-glutamyl transferase; LDL, low-density lipoprotein; HDL, high-density lipoprotein; HCC, hepatocellular carcinoma.

**Table S2.** Univariate Cox regression for the development of hepatocellular carcinoma in the training cohort.

| Variable                                   | P value | Hazard ratio (95% CI)    | Variable                                     | P value | Hazard ratio (95% CI)   |
|--------------------------------------------|---------|--------------------------|----------------------------------------------|---------|-------------------------|
| Age (years)                                | <0.001  | 1.119 (1.076, 1.163)     | Platelet count ( $\times 10^3/\mu\text{L}$ ) | <0.001  | 0.974 (0.967, 0.982)    |
| $\geq 55$ (vs. <55)                        | 0.001   | 12.750 (2.980, 54.555)   | <150 (vs. $\geq 150$ )                       | <0.001  | 7.875 (3.205, 19.345)   |
| $\geq 60$ (vs. <60)                        | <0.001  | 11.223 (3.798, 33.165)   | <166 (vs. $\geq 166$ )                       | <0.001  | 31.759 (10.616, 95.010) |
| $\geq 65$ (vs. <65)                        | <0.001  | 9.347 (3.919, 22.292)    | Aspartate aminotransferase (IU/L)            | 0.002   | 1.013 (1.005, 1.022)    |
| $\geq 70$ (vs. <70)                        | <0.001  | 14.595 (6.283, 33.907)   | $\geq 34$ (vs. <34)                          | 0.068   | 2.310 (0.942, 5.665)    |
| Male sex                                   | 0.254   | 1.686 (0.687, 4.135)     | $\geq 38$ (vs. <38)                          | 0.012   | 3.181 (1.297, 7.804)    |
| Diabetes mellitus                          | 0.157   | 1.850 (0.789, 4.341)     | Alanine aminotransferase (IU/L)              | 0.267   | 0.992 (0.978, 1.006)    |
| Hypertension                               | 0.054   | 2.423 (0.984, 5.963)     | $\geq 34$ (vs. <34)                          | 0.439   | 0.719 (0.312, 1.659)    |
| Body mass index ( $\text{kg}/\text{m}^2$ ) | 0.610   | 1.029 (0.921, 1.150)     | Total bilirubin (mg/dL)                      | <0.001  | 4.786 (2.491, 9.197)    |
| $\geq 18$ (vs. <18)                        | 0.214   | 0.161 (0.009, 2.866)     | $\geq 2.0$ (vs. <2.0)                        | <0.001  | 10.939 (3.231, 37.033)  |
| $\geq 25$ (vs. <25)                        | 0.897   | 1.061 (0.433, 2.605)     | $\geq 0.9$ (vs. <0.9)                        | 0.001   | 4.496 (1.886, 10.719)   |
| Cirrhosis*                                 | <0.001  | 65.851 (22.268, 194.732) | Albumin (g/dL)                               | <0.001  | 0.093 (0.043, 0.203)    |
| Liver stiffness measurement (kPa)          | <0.001  | 1.089 (1.071, 1.108)     | <3.4 (vs. $\geq 3.4$ )                       | <0.001  | 21.432 (6.250, 73.486)  |
| $\geq 8.3$ (vs. <8.3)                      | <0.001  | 34.09 (7.968, 145.856)   | <4.5 (vs. $\geq 4.5$ )                       | 0.002   | 9.901 (2.314, 42.365)   |
| $\geq 9.3$ (vs. <9.3)                      | <0.001  | 51.475 (12.030, 220.256) | Prothrombin time (INR)                       | 0.088   | 2.752 (0.860, 8.803)    |
| $\geq 11.0$ (vs. <11)                      | <0.001  | 35.141 (11.891, 103.854) | $\geq 1.5$ (vs. <1.5)                        | 0.610   | 2.152 (0.113, 40.829)   |
| $\geq 14.0$ (vs. <14)                      | <0.001  | 34.212 (13.384, 87.453)  | Serum creatinine (mg/dL)                     | 0.896   | 0.888 (0.150, 5.268)    |
| Liver stiffness group (vs. <8.3 kPa)       | -       | ref                      | Gamma-glutamyl transferase (mg/dL)           | 0.008   | 1.004 (1.001, 1.006)    |
| $\geq 8.3$ , <11.0                         | 0.051   | 7.072 (0.996, 50.209)    | Alkaline phosphatase (IU/L)                  | 0.001   | 1.007 (1.003, 1.011)    |
| $\geq 11.0$ , <14.0                        | 0.004   | 18.623 (2.623, 132.224)  | $\geq 150$ (vs. <150)                        | 0.127   | 4.771 (0.640, 35.573)   |
| $\geq 14.0$                                | <0.001  | 88.322 (20.306, 384.157) | Triglyceride (mg/dL)                         | 0.558   | 0.998 (0.992, 1.004)    |
| Liver stiffness group (vs. <9.3 kPa)       | -       | ref                      | LDL-cholesterol (mg/dL)                      | 0.061   | 0.98 (0.960, 1.001)     |
| $\geq 9.3$ , <11.0                         | 0.005   | 17.004 (2.395, 120.744)  | HDL-cholesterol (mg/dL)                      | 0.148   | 0.954 (0.896, 1.017)    |
| $\geq 11.0$ , <14.0                        | 0.003   | 20.313 (2.861, 144.234)  | Total cholesterol (mg/dL)                    | 0.001   | 0.978 (0.966, 0.990)    |
| $\geq 14.0$                                | <0.001  | 92.645 (21.300, 402.958) | $\geq 168$ (vs. <168)                        | 0.001   | 4.696 (1.914, 11.518)   |
| Controlled attenuated parameter (dB/m)     | 0.114   | 0.990 (0.979, 1.002)     |                                              |         |                         |

Additional Cox regression analyses were performed on continuous variables after changing them to dichotomous categorical variables. \* Cirrhosis are diagnosed by imaging studies such as abdomen ultrasonography or computed tomography. INR, international normalized ratio; LDL, low-density lipoprotein; HDL, high-density lipoprotein.

**Table S3.** Cox multivariate analysis for the development of hepatocellular carcinoma in patients with non-alcoholic fatty liver disease using variables incorporated in the prediction model.

| Variable                              |           | Model 1                |         | Model 2                 |         | Model 3                 |         |
|---------------------------------------|-----------|------------------------|---------|-------------------------|---------|-------------------------|---------|
|                                       |           | HR (95% CI)            | p Value | HR (95% CI)             | p Value | HR (95% CI)             | p Value |
| Age (year)                            | ≥60       | 10.377 (2.344, 45.935) | 0.002   | 10.566 (2.381, 46.896)  | 0.002   | 10.056 (2.273, 44.494)  | 0.002   |
| Platelet count (×10 <sup>3</sup> /μL) | <150      | 4.300 (1.557, 11.876)  | 0.005   | 3.246 (1.114, 9.459)    | 0.031   | 4.985 (1.835, 13.543)   | 0.002   |
| AST (IU/L)                            | ≥34       | 1.691 (0.585, 4.889)   | 0.332   | 1.565 (0.539, 4.547)    | 0.410   | 1.589 (0.560, 4.512)    | 0.385   |
|                                       | ≥11.0     | 14.102 (3.615, 55.016) | 0.000   |                         |         |                         |         |
| Liver Stiffness <sup>†</sup> (kPa)    | <9.3      |                        |         | Reference               | -       |                         |         |
|                                       | 9.3–11.0  |                        |         | 4.377 (0.381, 50.239)   | 0.236   |                         |         |
|                                       | 11.0–14.0 |                        |         | 10.617 (1.42, 79.399)   | 0.021   |                         |         |
|                                       | ≥14.0     |                        |         | 25.802 (4.928, 135.093) | 0.000   |                         |         |
|                                       | <7.5      |                        |         |                         |         | Reference               | -       |
|                                       | 7.5–9.6   |                        |         |                         |         | 6.989 (0.623, 78.459)   | 0.115   |
|                                       | ≥9.6      |                        |         |                         |         | 23.026 (2.776, 190.992) | 0.004   |

HR, hazard ratio; CI, confidence interval; AST, aspartate aminotransferase. † Measured by transient elastography (FibroScan®, EchoSens, Paris, France).

**Table S4.** Nomogram for each risk prediction model for HCC development.

| Models                                 | Model 1 (max 263 points) |                      | Model 2 (max 227 points) |                      | Model 3 (max 240 Points) |                      |
|----------------------------------------|--------------------------|----------------------|--------------------------|----------------------|--------------------------|----------------------|
| Covariates                             | Category                 | Points *             | Category                 | Points *             | Category                 | Points *             |
| Liver stiffness <sup>†</sup> (kPa)     | ≥11.0                    | 100                  | 9.3–11.0                 | 16                   | 7.5–9.6                  | 62                   |
|                                        |                          |                      | 11.0–14.0                | 43                   | ≥9.6                     | 100                  |
|                                        |                          |                      | ≥14.0                    | 100                  |                          |                      |
| Age (years)                            | ≥60                      | 88                   | ≥60                      | 47                   | ≥60                      | 74                   |
| Platelet counts (×10 <sup>3</sup> /μL) | <150                     | 55                   | <150                     | 74                   | <150                     | 51                   |
| AST (IU/L)                             | ≥34                      | 20                   | ≥34                      | 6                    | ≥34                      | 15                   |
| Time point                             | Total Points             | HCC-free probability | Total Points             | HCC-free probability | Total Points             | HCC-free probability |
| At 2 years                             | 168                      | 0.99                 | 161                      | 0.99                 | 164                      | 0.99                 |
|                                        | 257                      | 0.90                 | 214                      | 0.90                 | 239                      | 0.90                 |
|                                        | 148                      | 0.99                 | 149                      | 0.99                 | 148                      | 0.99                 |
|                                        | 237                      | 0.90                 | 202                      | 0.90                 | 223                      | 0.90                 |
|                                        | 254                      | 0.85                 | 212                      | 0.85                 | 236                      | 0.85                 |
| At 3 years                             | 263                      | 0.81                 | 219                      | 0.80                 | 240                      | 0.83                 |
|                                        |                          |                      | 225                      | 0.75                 |                          |                      |
|                                        |                          |                      | 227                      | 0.73                 |                          |                      |
|                                        | 138                      | 0.99                 | 142                      | 0.99                 | 139                      | 0.99                 |
|                                        | 199                      | 0.95                 | 179                      | 0.95                 | 191                      | 0.95                 |
| At 5 years                             | 227                      | 0.90                 | 195                      | 0.90                 | 214                      | 0.90                 |
|                                        | 243                      | 0.85                 | 205                      | 0.85                 | 228                      | 0.85                 |
|                                        | 255                      | 0.80                 | 212                      | 0.80                 | 238                      | 0.80                 |
|                                        | 263                      | 0.76                 | 218                      | 0.75                 | 240                      | 0.79                 |
|                                        |                          |                      | 223                      | 0.70                 |                          |                      |
|                                        |                          |                      | 227                      | 0.65                 |                          |                      |

HCC, hepatocellular carcinoma; AST, aspartate aminotransferase. \*Zero point, if the condition is not met. †Measured by transient elastography (FibroScan®, EchoSens, Paris, France).

**Table S5.** Time-dependent AUCs and iAUC of each risk prediction model in the training cohort, internal validation using the bootstrap method, and external validation.

| Model 1 | Training cohort      | Internal validation (bootstrap) | Validation cohort    |
|---------|----------------------|---------------------------------|----------------------|
| iAUC    | 0.939 (0.902, 0.976) | 0.945 (0.906, 0.979)            | 0.762 (0.582, 0.942) |
| 2yr AUC | 0.943 (0.908, 0.978) | 0.949 (0.911, 0.978)            | 0.755 (0.579, 0.931) |
| 3yr AUC | 0.941 (0.904, 0.978) | 0.947 (0.909, 0.978)            | 0.758 (0.584, 0.932) |
| 5yr AUC | 0.933 (0.892, 0.974) | 0.941 (0.898, 0.978)            | 0.787 (0.609, 0.965) |
| Model 2 | Training cohort      | Internal validation (bootstrap) | Validation cohort    |
| iAUC    | 0.944 (0.909, 0.979) | 0.954 (0.916, 0.982)            | 0.782 (0.610, 0.954) |
| 2yr AUC | 0.948 (0.917, 0.979) | 0.956 (0.922, 0.982)            | 0.777 (0.606, 0.948) |
| 3yr AUC | 0.947 (0.914, 0.980) | 0.955 (0.920, 0.983)            | 0.781 (0.614, 0.948) |
| 5yr AUC | 0.939 (0.900, 0.978) | 0.950 (0.909, 0.983)            | 0.784 (0.619, 0.949) |
| Model 3 | Training cohort      | Internal validation (bootstrap) | Validation cohort    |
| iAUC    | 0.942 (0.907, 0.977) | 0.950 (0.909, 0.977)            | 0.729 (0.531, 0.927) |
| 2yr AUC | 0.945 (0.912, 0.978) | 0.951 (0.913, 0.977)            | 0.722 (0.528, 0.916) |
| 3yr AUC | 0.944 (0.909, 0.979) | 0.950 (0.912, 0.977)            | 0.725 (0.531, 0.919) |
| 5yr AUC | 0.940 (0.903, 0.977) | 0.947 (0.902, 0.976)            | 0.728 (0.550, 0.906) |

Values are expressed as AUC (95% confidence interval). AUC, area under the receiver operating characteristic curve; iAUC, integrated AUC.

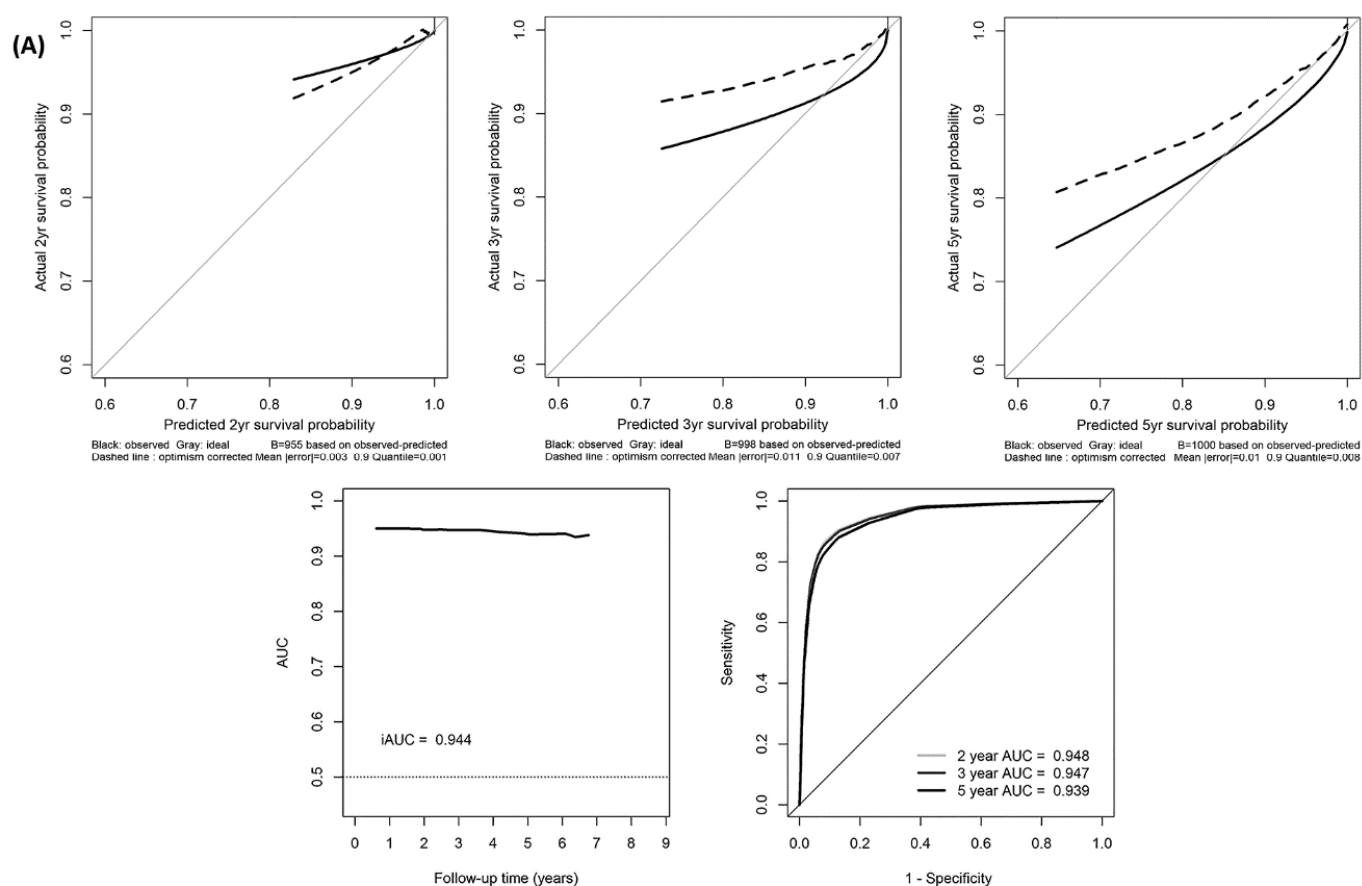

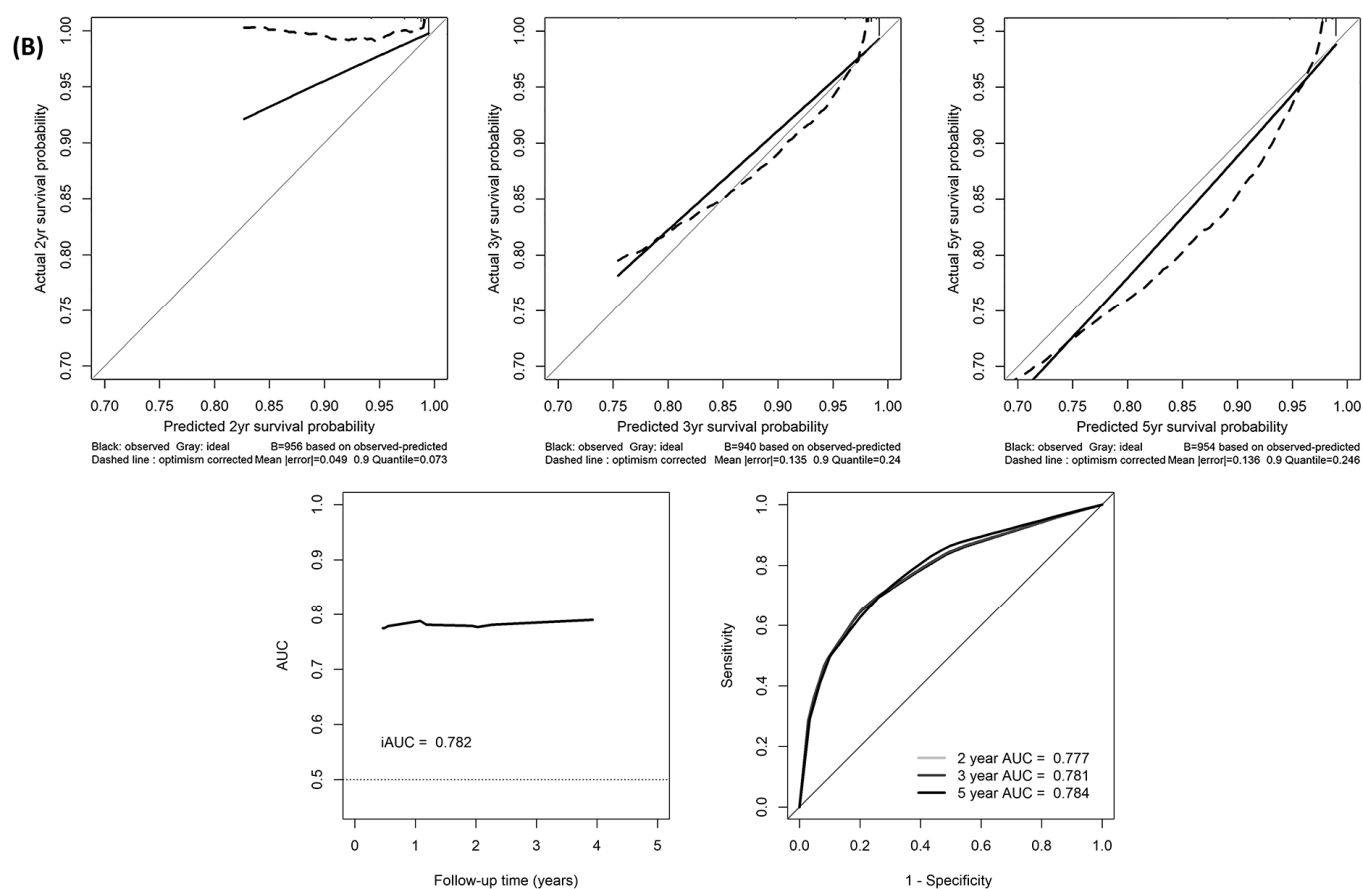

**Figure S1.** Calibration plots of the risk prediction model at 2-, 3-, and 5-year; iAUC and time-dependent receiver operational characteristics curves in training (A) and validation cohort (B). AUC, area under the receiver operational characteristics curves; iAUC, integrated AUC.

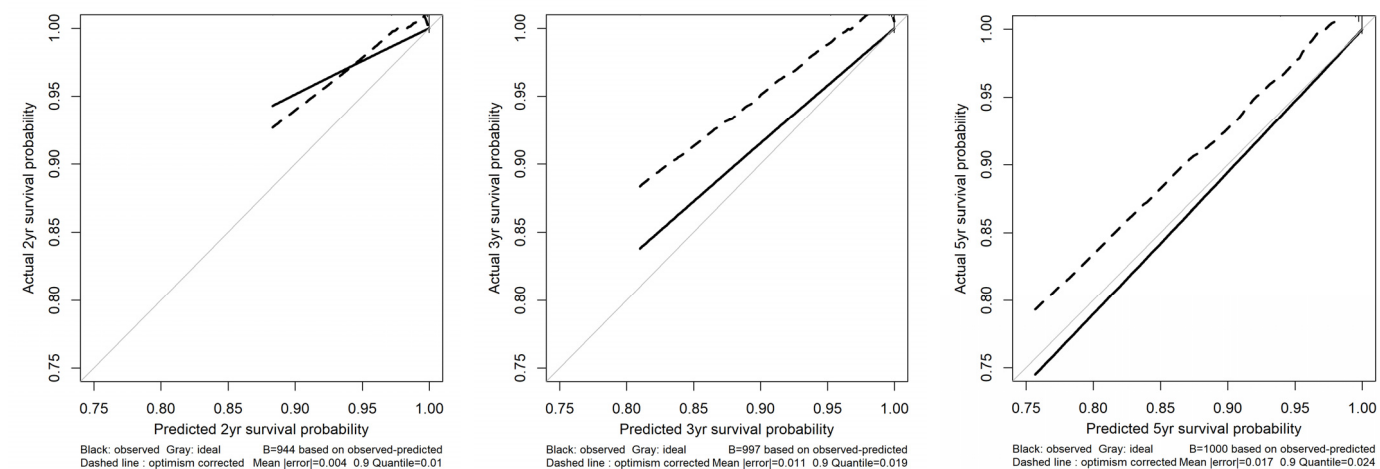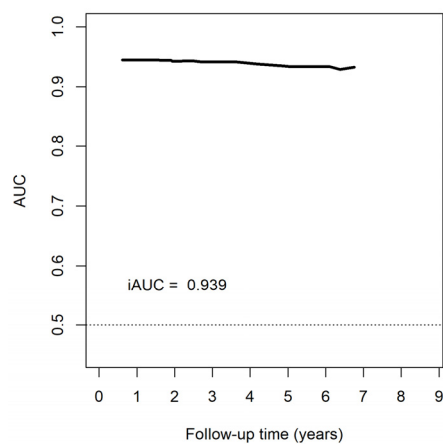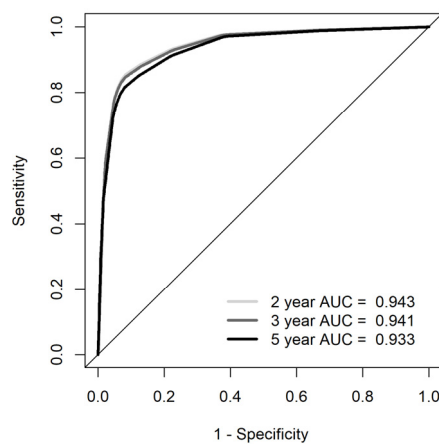

(A)

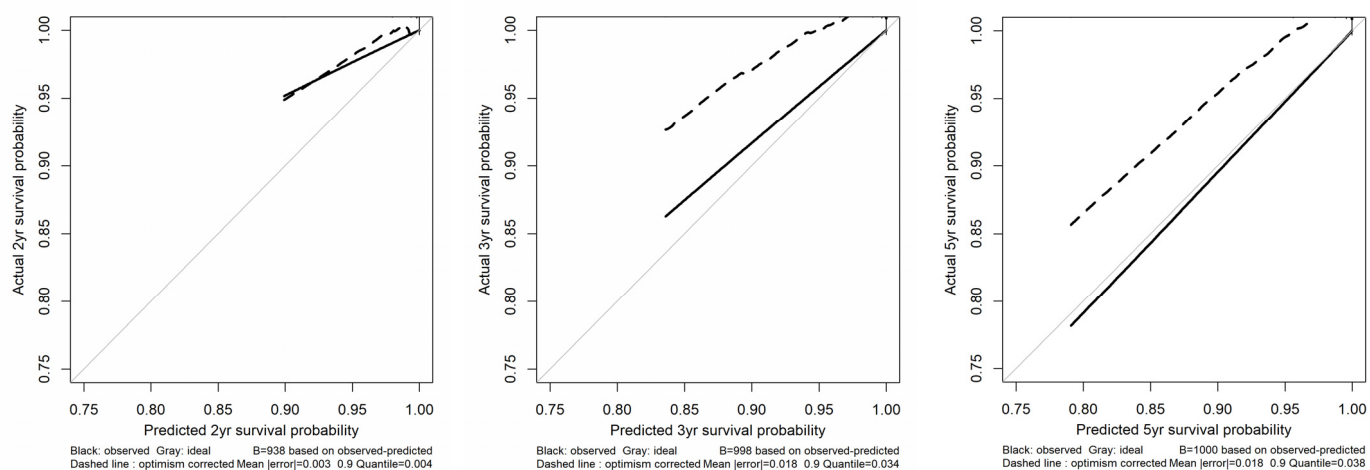

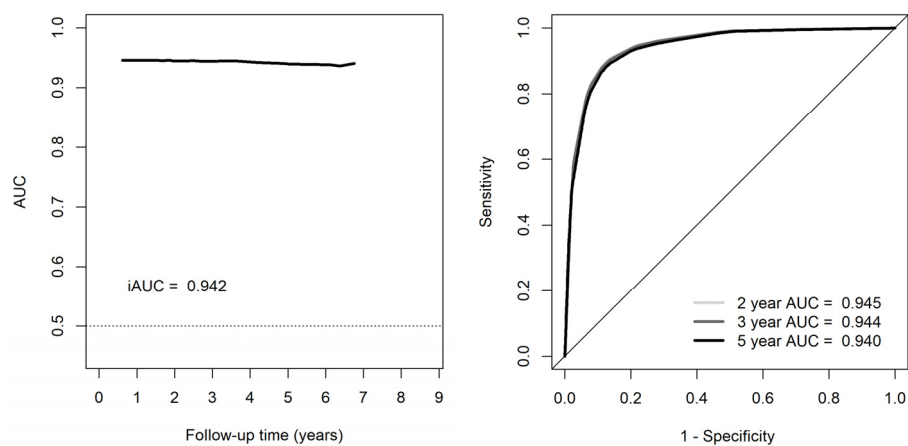

(B)

**Figure S2.** Calibration plots, iAUCs and time-dependent receiver operational characteristics curves of prediction model 1 (A) and 3 (B) in the training cohort. AUC, area under the receiver operational curve; iAUC, integrated AUC.

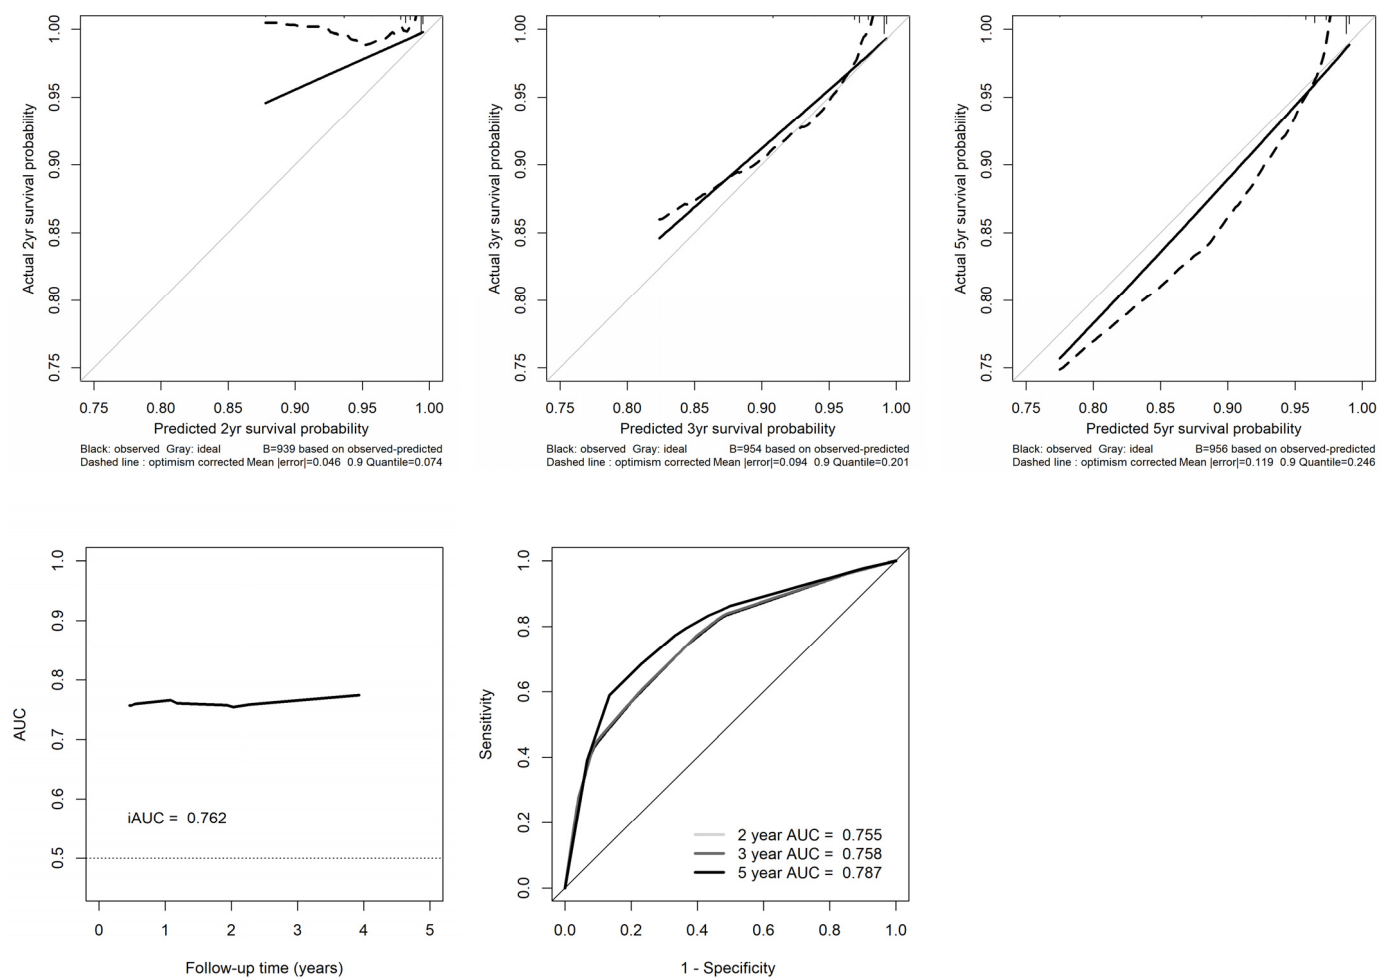

(A)

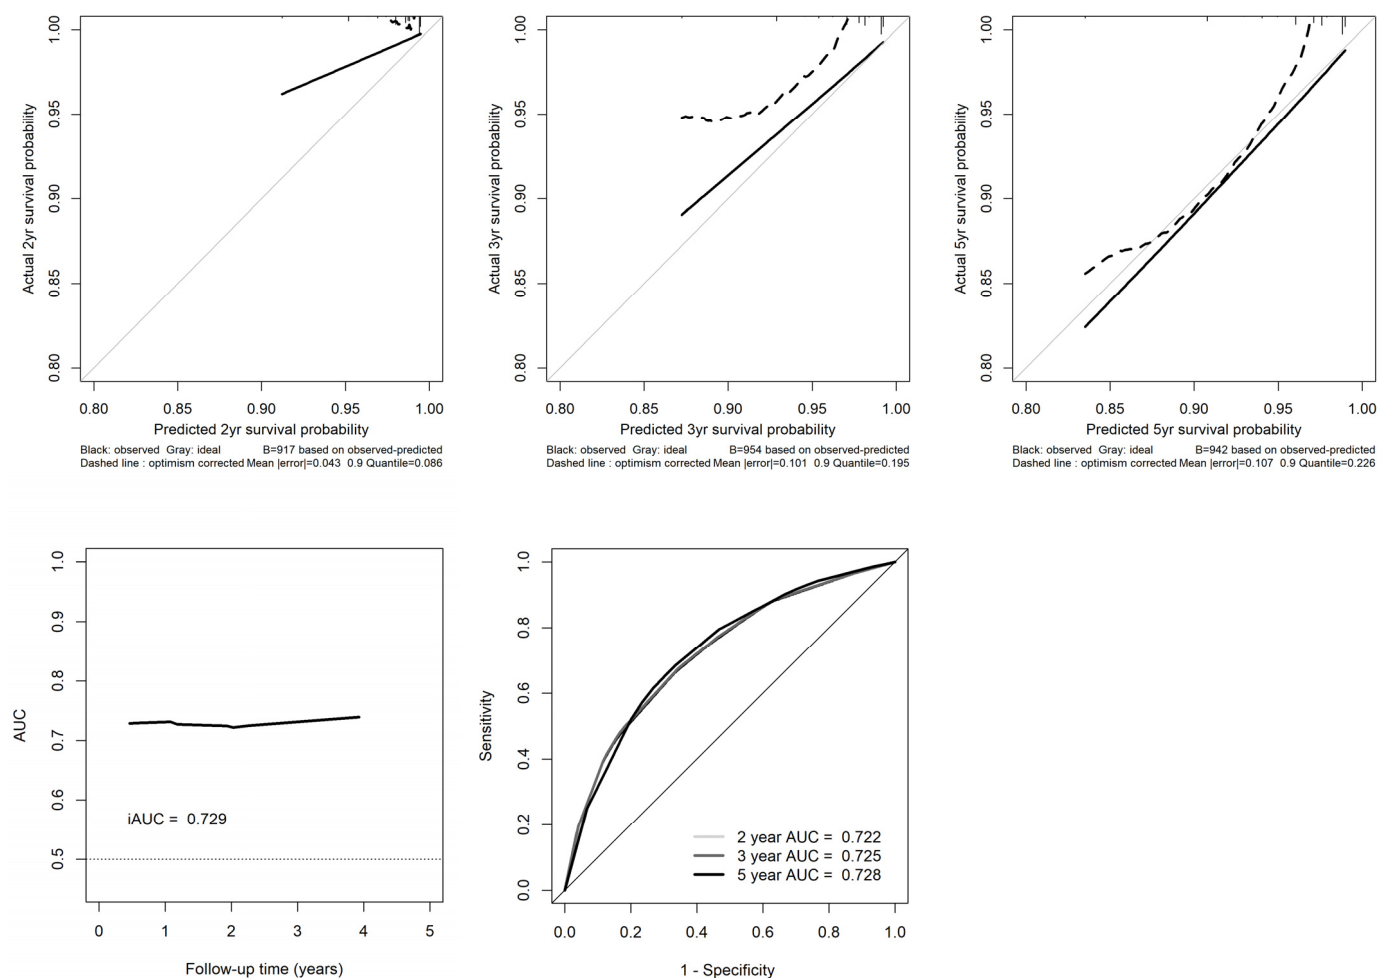

(B)

**Figure S3.** Calibration plots, iAUCs and time-dependent receiver operational characteristics curves of prediction model 1 (A) and 3 (B) in the validation cohort. AUC, area under the receiver operational curve; iAUC, integrated AUC.
